# Supplementary material for: The largest plastome section in Orchidaceae: expanded size and large inversion of Cypripedium sect. Trigonopedia
Source: Research Square preprint supplement (doi:10.21203/rs.3.rs-7252682/v1), 2025-08-11
Supplement: Supplementary file 1 [file 0aa4e6db5dc4c7eedc27ae72.docx]

Table S1. Genes annotation for three plastomes of sect. *Trigonopedia*

| Category for genes | Group of gene | Name of gene |
| --- | --- | --- |
| Genes for Genetic  System | Large subunit of ribosome  (LSU) | *rpl14,rpl16*,rpl2**(×2)*,rpl20,rpl22*(×2)*,rpl23*(×2)*,rpl32,rpl33,rpl36* |
| Small subunit of ribosome  (SSU) | *rps2*, *rps3*, *rps4*, *rps7*(×2), *rps8*, *rps11*, *rps12***(×2), *rps14*, *rps15*, *rps16**, *rps18*, *rps19*(×2) |
|  | DNA dependent RNA  polymerase | *rpoA*, *rpoB*, *rpoC1**, *rpoC2* |
|  | ribosomal RNA (rRNA) | *rrn4.5*(×2), *rrn5*(×2), *rrn16*(×2), *rrn23*(×2) |
|  | transfer RNA (tRNA) | *trnAUGC**(×2), *trnCGCA*, *trnDGUC*, *trnEUUC*, *trnFGAA*,  *trnfMCAU*, *trnGGCC*, *trnGUCC**, *trnHGUG*(×2), *trnICAU*(×2), *trnIGAU**(×2), *trnKUUU**, *trnLCAA*(×2), *trnLUAA**, *trnLUAG*, *trnMCAU*, *trnNGUU*(×2), *trnPUGG*, *trnQUUG*, *trnRACG*(×2), *trnRUCU*, *trnSGCU*, *trnSGGA*, *trnSUGA*, *trnTGGU,* *trnTUGU*, *trnVGAC*(×2), *trnVUAC**, *trnWCCA*, *trnYGUA* |
|  | Translational  initiation factor | *infA* |
| Genes for  Photosynthetic  System | Subunits of Photosystem I | *psaA*, *psaB*, *psaC*, *psaI*, *psaJ* |
| Subunits of Photosystem II | *psbA*, *psbB*, *psbC*, *psbD*, *psbE*, *psbF*, *psbH*, *psbI*, *psbJ*,  *psbK*, *psbL*, *psbM*, *psbN*, *psbT*, *psbZ* |
| NADH dehydrogenase subunits | *ndhA***,ndhB**(×2)*,ndhC***,ndhD,ndhE,ndhF,ndhG,ndhH,ndhI,ndhJ,ndhK* |
|  | Cytochrome b/f complex | *petA*, *petB**, *petD**, *petG*, *petL*, *petN* |
|  | ATP synthase | *atpA*, *atpB*, *atpE*, *atpF**, *atpH*, *atpI* |
|  | Large subunit of Rubisco | *rbcL* |
| Genes for  Biosynthesis | Maturase | *matK* |
| ATP-dependent protease  proteolytic subunit | *clpP*** |
|  | Envelop membrane protein | *cemA* |
|  | Acetyl-CoA-carboxylase | *accD* |
|  | C-type cytchrome  synthesis gene | *ccsA* |
| Genes for unknown function | Open Reading Frames of  unknown function | ψ*ycf1*, *ycf1*, *ycf2*(×2), *ycf3***, *ycf4* |

*: contains one intron; **: contains two introns; (×2): genes located in IRs; ψ: pseudogene

Table S2. The genes with introns and the lengths of exons and intron

| Gene | Location | Exon Ⅰ (bp) | Intron Ⅰ (bp) | Exon Ⅱ (bp) | Intron Ⅱ (bp) | Exon Ⅲ (bp) | Species |
| --- | --- | --- | --- | --- | --- | --- | --- |
| trnK-UUU | LSC | 37 | 4965-6707,7188 | 35 |  |  | f l s |
| rps16 | LSC | 40 | 1213-2801,1232 | 206 |  |  | f l s |
| trnV-UAC | LSC | 39 | 587-589 | 35-37 |  |  | f l s |
| ndhC | LSC | 141 | 19 | 222 |  |  | f |
| trnL-UAA | LSC | 35 | 1898-2423,2347 | 50 |  |  | f l s |
| ycf3 | LSC | 126 | 714-725 | 228 | 779 | 153 | f l s |
| rpoC1 | LSC | 428-432 | 774-781 | 1614-1618 |  |  | f l s |
| atpF | LSC | 144 | 1539,1604-2577 | 411 |  |  | f l s |
| trnG-UCC | LSC | 23 | 684,685-701 | 48 |  |  | f l s |
| rps12 | IR | 114 | - | 232-234 | 555 | 24-26 | f l s |
| clpP | LSC | 69-71 | 2257,2262-2478 | 291-292 |  | 231 | f l s |
| petB | LSC | 6 | 241 | 642 |  |  | f l s |
| petD | LSC | 6-9 | 22-983 | 483-486 |  |  | f l s |
| rpl16 | LSC | 9 | 2600,2706 | 405 |  |  | f s |
| rpl2 | IR | 391 | 664-671 | 431 |  |  | f l s |
| trnA-UGC | IR | 38 | 795 | 35 |  |  | f l s |
| ndhA | SSC | 552-553 | 1365-1782 | 333-539 |  |  | f l |
| trnI-GAU | IR | 36 | 912-944 | 36 |  |  | f l s |
| ndhB | IR | 777 | 709 | 756 |  |  | l |

red: represents two introns; f,l,s: represents *C. fargesii*, *C. lichiangense*, *C. sichuanense*.
