# Supplementary material for: The largest plastome section in Orchidaceae: expanded size and large inversion of Cypripedium sect. Trigonopedia
Source: Research Square preprint supplement (doi:10.21203/rs.3.rs-7252682/v1), 2025-08-11
Supplement: Supplementary file 2 [file 10eccc5e970b1dd3f8650022.xlsx]

## Sheet: Table S3
Table S3. Nucleotide variability (Pi) values of top 30 hyperviable genes across all plastomes of Cypripedium
Gene	Region	Pi
ndhD	SSC	0.06579
ndhA	SSC	0.03274
ndhB	IR	0.03093
rpl32	SSC	0.02757
ndhG	SSC	0.02721
ycf1	SSC	0.02409
rpl33	LSC	0.02361
ndhJ	LSC	0.02356
psbM	LSC	0.02182
ndhC	LSC	0.02158
matK	LSC	0.02143
psbK	LSC	0.01916
ccsA	SSC	0.01885
rps15	SSC	0.01698
rps16	LSC	0.01649
cemA	LSC	0.01573
psbZ	LSC	0.0153
accD	LSC	0.01509
clpP	LSC	0.01505
ndhK	LSC	0.01496
rps3	LSC	0.01494
rps18	LSC	0.01462
rpl16	LSC	0.01456
ndhH	SSC	0.01438
rpl22	LSC	0.01392
petL	LSC	0.01364
ndhE	SSC	0.0135
ndhI	SSC	0.01214
trnS-GGA	LSC	0.01129
psaJ	LSC	0.01117

## Sheet: Table S4
Table S4. Numbers of different SSRs types in eleven species of Cypripedium
	A/T	C/G	AT/AT	AC/GT	AG/CT	AAC/GTT	AAG/CTT	ACT/AGT	AAT/ATT	ATC/ATG	AAAG/CTTT	AAAT/ATTT	AATG/ATTC	AATT/AATT	ACAG/CTGT	AATC/ATTG	AAAC/GTTT	AGAT/ATCT	AACC/GGTT	ACAT/ATGT	AAAAT/ATTTT	AATCT/AGATT	AAATT/AATTT	AATAT/ATATT	AATAG/ATTCT	AATAC/ATTGT	AATCT/AGATT	ACTAT/AGTAT	AATAGT/ACTATT	AAATTC/AATTTG	AAATAC/ATTTGT	AATATT/AATATT	AATTAT/AATTAT	AAATAT/ATATTT	AACATT/AATGTT	AAGGTG/ACCTTC	AGATAT/ATATCT	AAAATT/AATTTT	AAAAAT/ATTTTT	ACCTAT/AGGTAT	ACTAGT/ACTAGT	AATATC/ATATTG	AATATG/ATATTC	AATTAG/AATTCT	AAGAAT/ATTCTT	AATGAT/ATCATT	ACATAT/ATATGT	total
C. palangshanense	59	1	121	2	2	0	1	0	125	0	4	29	3	3	1	1	0	3	0	2	5	0	1	33	3	0	0	0	1	1	0	0	2	4	0	0	0	0	1	0	0	1	0	0	0	0	0	409
C. debile	56	1	25	0	0	0	0	2	26	0	5	10	3	1	2	1	0	2	0	2	0	0	0	1	0	0	0	0	0	0	0	0	0	0	0	0	0	0	0	0	0	1	0	0	0	0	0	138
C. subtropicum	75	1	136	0	2	0	1	2	153	0	1	50	2	7	1	1	1	3	1	1	11	0	8	51	0	0	0	0	0	0	1	3	6	16	0	0	1	0	0	0	0	0	0	0	0	0	0	535
C. tibeticum	61	0	112	0	2	1	3	2	118	0	1	58	2	4	1	1	0	2	0	1	11	0	4	70	1	0	2	3	0	0	0	4	8	11	0	0	1	7	1	1	1	0	0	0	1	1	2	498
C. japonicum	53	0	42	0	2	0	3	2	27	0	1	17	2	2	1	1	0	2	0	0	5	0	0	16	0	0	1	0	0	0	0	1	2	0	0	0	0	0	0	1	0	0	0	0	1	0	0	182
C. formosanum	64	1	51	0	2	0	3	2	43	0	1	20	2	3	1	1	0	2	0	1	3	1	1	15	0	0	1	1	0	0	0	1	1	0	0	0	0	0	0	0	0	0	0	0	1	0	0	222
C. calceolus	71	0	40	0	2	1	3	2	28	0	2	20	2	2	1	1	0	0	0	1	5	0	2	16	0	0	0	0	0	0	1	1	1	2	0	0	0	0	0	0	1	1	0	0	0	2	0	208
Cypripedium yunnanense	66	0	54	0	2	1	3	2	33	0	1	27	2	0	1	2	0	2	0	1	5	0	3	11	1	1	0	1	0	0	0	1	1	3	0	0	1	0	0	1	1	0	0	0	0	0	0	227
Cypripedium macranthos	60	2	11	0	3	0	0	0	2	0	1	5	0	0	0	0	1	0	0	0	0	0	0	1	0	0	0	0	0	0	0	0	0	0	0	0	0	0	0	0	0	0	0	0	0	0	0	86
Cypripedium sichuanense	61	0	114	2	0	0	0	2	138	2	1	54	2	6	1	1	0	2	0	2	10	0	0	59	1	0	0	0	0	0	1	0	0	1	0	0	0	0	0	0	0	0	1	1	0	0	0	462
Cypripedium lichiangense	59	0	151	0	2	0	0	2	270	2	1	100	2	15	1	1	0	2	0	2	15	0	4	120	1	0	0	0	1	0	0	6	7	11	1	1	1	2	2	0	0	0	0	0	0	0	0	782
Cypripedium fargesii	62	0	111	2	0	0	0	2	137	2	1	52	2	5	1	1	0	2	0	2	7	0	0	60	1	0	0	0	0	0	1	1	0	2	0	0	0	0	1	0	0	0	1	1	0	0	0	457
total	747	6	968	6	19	3	17	20	1100	6	20	442	24	48	12	12	2	22	1	15	77	1	23	453	8	1	4	5	2	1	4	18	28	50	1	1	4	9	5	3	3	3	2	2	3	3	2	4206
red: represents special types for sect.Trigonopedia; bule:represents loss of SSRs types in sect.Trigonopedia

## Sheet: Table S5
	Table S5 Distribution of sequences repeats in three plastomes of sect. Trigonopedia
	Tables S5-1 Number of different short sequence repeat types detected in three plastomes
		Mono-	Di-	Tri-	Tetra-	Penta-	Hexa-
	C.fargesii	19	14	48	27	25	6	139
	C.lichiangense	17	15	54	33	30	19	168
	C.sichuanense	17	14	47	25	23	4	130
	Table S5-2 Frequencies of SSRs in different location (%)
	species	Region	Exon	Intron	Intergenic	total
	C.fargesii	LSC	3	20	54	77
		SSC	3	1	12	16
		IR	4	0	3	7
	C.sichuanense	LSC	3	20	53	76
		SSC	4	0	14	18
		IR	4	0	2	6
	C.lichiangense	LSC	2	12	69	83
		SSC	2	0	13	15
		IR	2	0	1	3
	Table S5-3 Number of long repeats based on types
		F	P	R	C	total
	C.fargesii	40	25	27	22	114
	C.lichiangense	46	31	38	25	140
	C.sichuanense	38	21	27	18	104

## Sheet: Table S6
Table S6 ka/ks of Cypripedium plastid genes
rps7	rps19	rps2	rps16	rps18	rps12	rps14	rps3	rps8	rps11	rps4	rps15	psaB	psaC	psaA	psaI	psaJ
0.17	0.18	0.19	0.22	0.22	0.25	0.27	0.27	0.34	0.38	0.88	0.97	0.12	0.17	0.2	0.29	0.71
rps												psa
psbA	psbD	psbE	psbC	psbI	psbH	psbB	psbL	psbK	psbM	psbN	psbZ		rpoA	rpoB	rpoC2	rpoC1
0.06	0.08	0.12	0.16	0.18	0.19	0.2	0.2	0.22	0.27	0.29	0.43		0.19	0.41	0.41	0.42
psb													rpo
rpl36	rpl33	rpl22	rpl2	rpl16	rpl20	rpl32	petB	petG	petL	petD	petA	atpB	atpI	atpA	atpE	atpF
0.17	0.19	0.22	0.31	0.42	0.49	0.5	0.08	0.14	0.3	0.31	0.36	0.1	0.3	0.3	0.54	1.05
rpl							pet					atp
ndhD	ndhG	ndhA	ndhJ	ndhF	ndhC	ndhB	ndhH	ndhE	ndhI	ndhK			ycf3	ycf1	ycf4	ycf2
0.26	0.35	0.39	0.49	0.5	0.54	0.58	0.65	0.81	0.79	0.93			0.05	0.6	0.68	0.8
ndh													ycf
infA	rbcL	ccsA	clpP	matK	cemA	accD
0.1	0.12	0.32	0.43	0.46	0.6	0.65
others

## Sheet: Table S7
Table S7. Taxonomic and Genbank accession information for samples used for phylogenetic analyses
Subfamily (4)	Species	Genebank accession	Source
Apostasioideae	Apostasia ramifera	NC_050919	NCBI
	Neuwiedia singapureana	KM_244735	NCBI
Cypripedioideae	Cypripedium fargesii	NC_084418	sequenced
	Cypripedium sichuanense	NC_084420	sequenced
	Cypripedium lichiangense	NC_084419	sequenced
	Cypripedium palangshanense	MW_924110	NCBI
	Cypripedium subtropicum	MT_937100	NCBI
	Cypripedium debile	MW_924111	NCBI
	Cypripedium japonicum	NC_027227	NCBI
	Cypripedium calceolus	NC_045400	NCBI
	Cypripedium formosanum	NC_026772	NCBI
	Cypripedium tibeticum	MT_937101	NCBI
	Cypripedium yunnanense	NC_071758	NCBI
	Paphiopedilum hangianum	NC_069869	NCBI
	Paphiopedilum micranthum	OM_066307	NCBI
Orchidoideae	Habenaria radiata	NC_035834	NCBI
	Platanthera japonica	NC_037440	NCBI
	Goodyera biflora	NC_064114	NCBI
	Ludisia diacolor	NC_030540	NCBI
	Anoectochilus formosanus	NC_061756	NCBI
	Anoectochilus roxburghii	NC_061758	NCBI
Epidendroideae	phalaenopsis aphrodite	NC_007499	NCBI
	phalaenopsis equestris	NC_017609	NCBI
	corallorhiza sinensis	NC_068142	NCBI
	Cymbidium wenshanense	NC_060519	NCBI
	Dendrobium sinense	NC_067940	NCBI
	Dendrobium wangliangii	NC_052727	NCBI
	Neottia japonica	MH_321183	NCBI
	Cephalanthera rubra	NC_041181	NCBI
	Epipactis purpurata	NC_041188	NCBI
	Epipactis thunbergii	NC_046817	NCBI
	Holcoglossum tsii	NC_048459	NCBI
	Holcoglossum omeiense	NC_064528	NCBI
Outgroup	Lilium regale	NC_052790	NCBI
	Arabidopsis thaliana	NC_000932	NCBI
